# Supplementary material
Source: publisher figshare collection journal article supplement (https://frontiersin.figshare.com/ndownloader/files/20016014)
Supplement: Supplementary file [file 20016014]

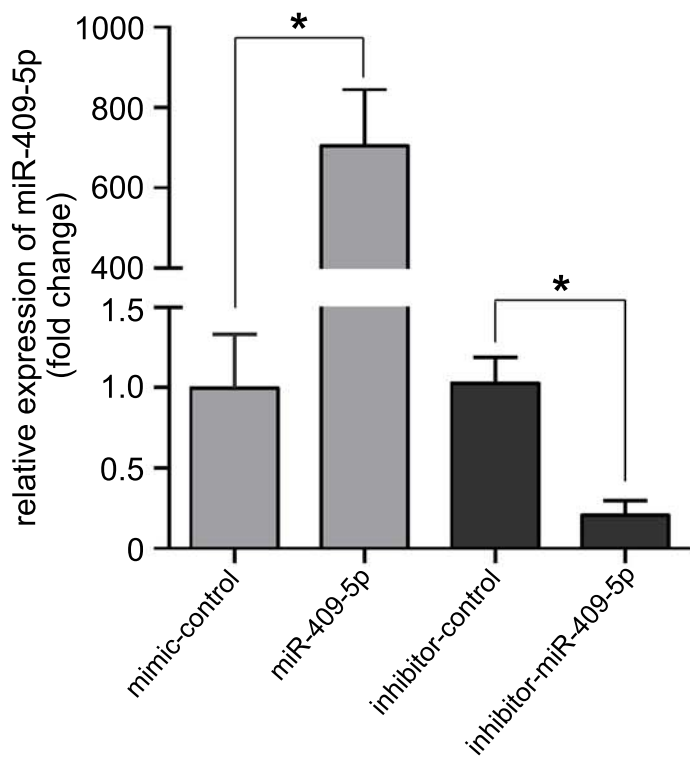

Supplementary figure 2. Transfection efficiency of miR-409-5p mimic and inhibitor.

PC12 cells were transfected with miR-409-5p mimic or inhibitor. Twenty-four hours later, relative expression level of miR-409-5p was examined by RT-qPCR. The results were shown as the mean $\pm$ SD (\* $p$ < 0.05,  $n$ =3).
